# Supplementary material for: Oxidative Stress-Induced TRPV2 Expression Increase Is Involved in Diabetic Cataracts and Apoptosis of Lens Epithelial Cells in a High-Glucose Environment
Source: MDPI journal article supplement (doi:10.3390/cells11071196), 2022-04-02
Supplement: s1 [file s1]

## ***Supplementary Figures***

### **Supplemental Methods**

#### **[Ca<sup>2+</sup>]<sub>i</sub> measurement**

HLEpiCs were incubated with Fura-2/AM (2  $\mu$ M, Abcam, ab120873) and 0.02% Pluronic F-127 (Sigma-Aldrich, P2443-250G) in an incubator kept in the dark for 30 min at 37 °C. Basal intracellular Ca<sup>2+</sup> concentration were measured for 10 min in a normal physiological saline solution containing (in mM) 140 NaCl, 5 KCl, 1 MgCl<sub>2</sub>, 10 glucose, 1 CaCl<sub>2</sub>, and 5 HEPES (pH 7.4). Ca<sup>2+</sup> fluorescence was recorded using fluorescence microscopy. Changes in the [Ca<sup>2+</sup>]<sub>i</sub> were expressed as the ratio of 340/380.

HLEpiCs were incubated with 10  $\mu$ M Fluo-8/AM in an incubator kept in the dark for 30 min at 37 °C. Cells were stimulated with 2-APB in a Ca<sup>2+</sup>-free buffer saline solution (0 Ca<sup>2+</sup>-BSS), containing (in mM) 140 NaCl, 5 KCl, 1 MgCl<sub>2</sub>, 10 glucose, 0.2 EGTA, and 5 HEPES (pH 7.4). When Ca<sup>2+</sup> influx reached equilibrium, 1 mM extracellular Ca<sup>2+</sup> was applied for 10 min. Ca<sup>2+</sup> fluorescence was recorded using fluorescence microscopy. Changes in the [Ca<sup>2+</sup>]<sub>i</sub> were expressed as the ratio of fluorescence intensity before and after the 2-APB or Ca<sup>2+</sup> application ( $F_1/F_0$ ).

HLEpiCs were incubated with 10  $\mu$ M Fluo-8/AM in an incubator kept in the dark for 30 min at 37 °C. Cells were treated with 10  $\mu$ M CRAC channels inhibitor BTP2 for 10 min in a normal physiological saline solution containing (in mM) 140 NaCl, 5 KCl, 1 MgCl<sub>2</sub>, 10 glucose, 1 CaCl<sub>2</sub>, and 5 HEPES (pH 7.4). When Ca<sup>2+</sup> influx reached equilibrium, 250  $\mu$ M 2-APB was applied for 10 min. Ca<sup>2+</sup> fluorescence was recorded using fluorescence microscopy. Changes in the [Ca<sup>2+</sup>]<sub>i</sub> were expressed as the ratio of fluorescence intensity before and after the 2-APB or BTP2 application ( $F_1/F_0$ ).

#### **Mitochondrial membrane potential assay**

After the treatment in different groups, HLEpiCs were loaded with fluorescent probe Rhodamine 123 (Beyotime, C2008S) diluted at a ratio of 1:1000 in serum-free medium and cultured at 37 °C with 5 % CO<sub>2</sub> for 30 min. Serum-free cell culture medium was used to wash excessive fluorescent dye. Finally, the fluorescence signal was detected by a fluorimeter.

## Supplementary Figures

### 1. Changes of TRPV2-mediated intracellular $Ca^{2+}$ concentration of lens epithelial cells

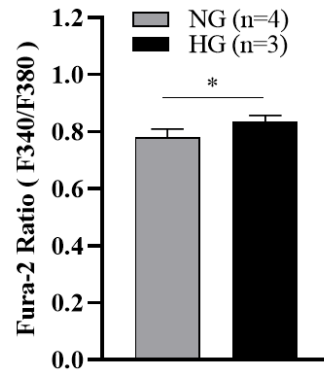

**Figure S1.** Summary data showing the Fura-2 fluorescence ratio (F340/F380) in HLEpiCs cultured in a normal-glucose (NG, 5.5 mM glucose and 20 mM mannitol) or high-glucose (HG, 25.6 mM glucose) medium for 7 days. Values are shown as the mean  $\pm$  SEM;  $n = 3-4$ . \* $P < 0.05$  vs. NG analyzed by two-tailed unpaired Student's  $t$  test.

### 2. 2-APB-induced intracellular $Ca^{2+}$ mobilization of lens epithelial cells

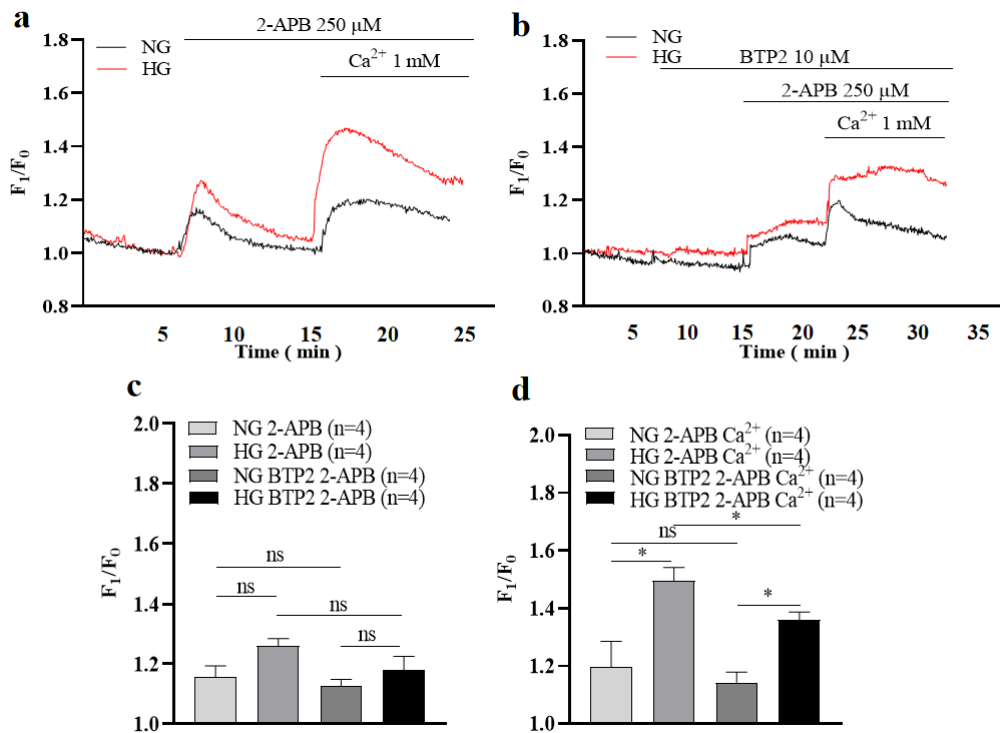

**Figure S2.** (a-d) Representative traces (a-b) and summary data (c-d) showing the changes in intracellular  $\text{Ca}^{2+}$  concentration of HLEpiCs cultured in NG or HG media for 7 days. (a-b,c) Intracellular  $\text{Ca}^{2+}$  release was activated by 2-APB (250  $\mu\text{M}$ ) and (a-b,d)  $\text{Ca}^{2+}$  influx was evoked by application of 1 mM extracellular  $\text{Ca}^{2+}$  in a  $\text{Ca}^{2+}$ -free buffer saline solution in HLEpiCs cultured in a normal-glucose (NG, 5.5 mM glucose and 20 mM mannitol) or high-glucose (HG, 25.6 mM glucose) medium for 7 days with or without BTP2 (10  $\mu\text{M}$ , an inhibitor of SOCE) treatment. Values are shown as the mean  $\pm$  SEM;  $n = 4$ .  $*P < 0.05$  vs. NG 2-APB or NG 2-APB  $\text{Ca}^{2+}$  analyzed by two-tailed unpaired Student's  $t$  test; ns, not significant.

### 3. Role of TRPV2 in high glucose-induced apoptosis of lens epithelial cells

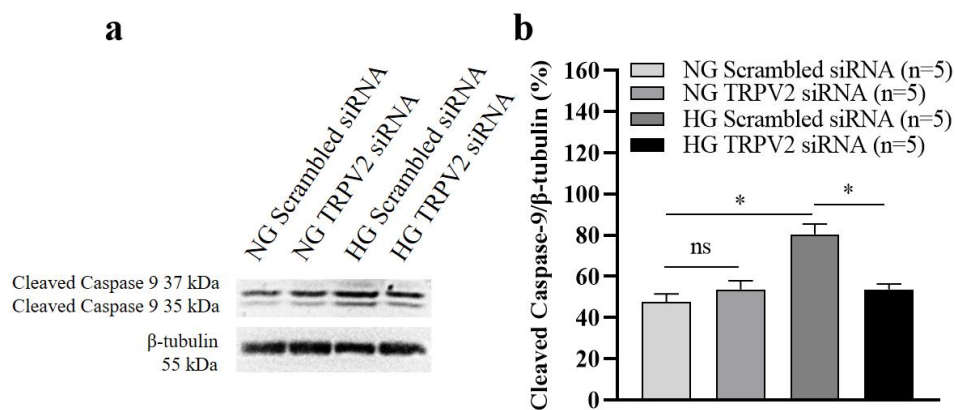

**Figure S3.** (a-b) Representative Western blotting images (a) and summary data (b) showing the levels of active caspase-9 in HLEpiCs cultured in a normal-glucose (NG, 5.5 mM glucose and 20 mM mannitol) or high-glucose (HG, 25.6 mM glucose) medium for 7 days and transfected with TRPV2 siRNA or scrambled siRNA control. Values are shown as the mean  $\pm$  SEM;  $n = 5$ .  $*P < 0.05$  analyzed by two-way analysis of variance followed by Bonferroni test; ns, not significant.

4. Role of TRPV2 and reactive oxygen species in high glucose–induced mitochondrial membrane potential decrease of lens epithelial cells

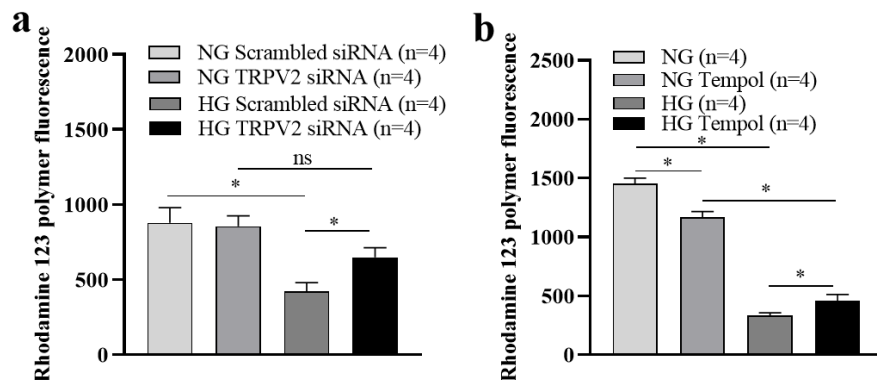

**Figure S4.** (a) Summary data showing the changes in mitochondrial membrane potential of HLEpiCs transfected with TRPV2 siRNA or scrambled siRNA control and cultured in a normal-glucose (NG, 5.5 mM glucose and 20 mM mannitol) or high-glucose (HG, 25.6 mM glucose) medium for 7 days. (b) Summary data showing the changes in mitochondrial membrane potential of HLEpiCs cultured in NG or HG medium with or without Tempol (1 mM, an antioxidant) treatment for 7 days. 2-way ANOVA was used to compare the significance in panels **a** and **b**. Values are shown as the mean  $\pm$  SEM; n = 4. \* $P$  < 0.05 analyzed by two-way analysis of variance followed by Bonferroni test; ns, not significant.
